# Supplementary material for: Shape evolution of parallelogrammic magnesium oxalate controlled by phosphate species
Source: Royal Society of Chemistry journal article supplement (doi:10.1039/c5ra10807a), 2015-01-01
Supplement: c5ra10807a1.pdf [file c5ra10807a1.pdf]

## Electronic Supplementary Information

### Shape Evolution of Parallelogrammic Magnesium Oxalate Controlled by Phosphate Species

Xiaoling Zhang,<sup>†</sup> Yajun Zheng,<sup>†</sup> Haijun Yang,<sup>‡</sup> Qian Wang,<sup>†</sup> and Zhiping Zhang<sup>†,\*</sup>

<sup>†</sup> School of Chemistry and Chemical Engineering, Xi'an Shiyou University, Xi'an 710065, China

<sup>‡</sup> Department of Chemistry, Tsinghua University, Beijing 100084, China

\* To whom correspondence should be addressed.

Phone, +86-29-8838 2694;

Email, zhangzp0304@gmail.com.

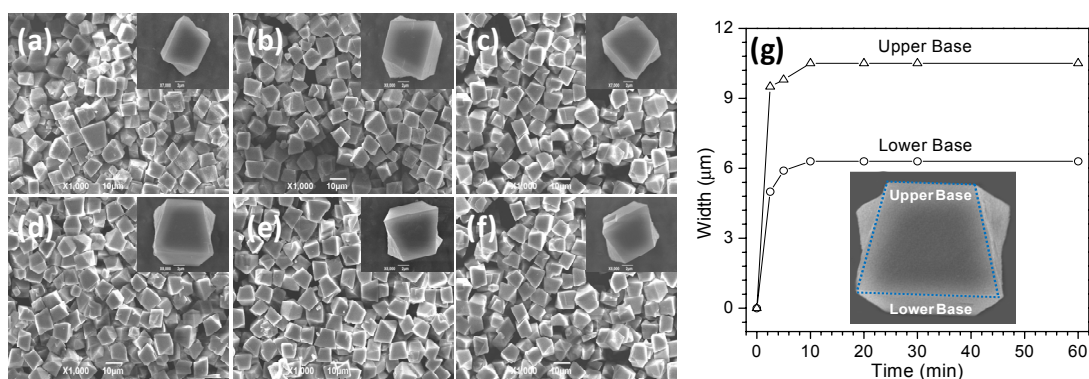

**Figure S-1.** SEM images of the particles from various reaction times at 323 K by pouring  $\text{Na}_2\text{C}_2\text{O}_4$  into  $\text{Mg}(\text{NO}_3)_2$  solution: (a) 2.5 min; (b) 5 min; (c) 10 min; (d) 20 min; (e) 30 min; (f) 60 min; and (g) the plot of the widths of upper base and lower base size of the obtained particles with reaction time, and inset is a typical particle collected.

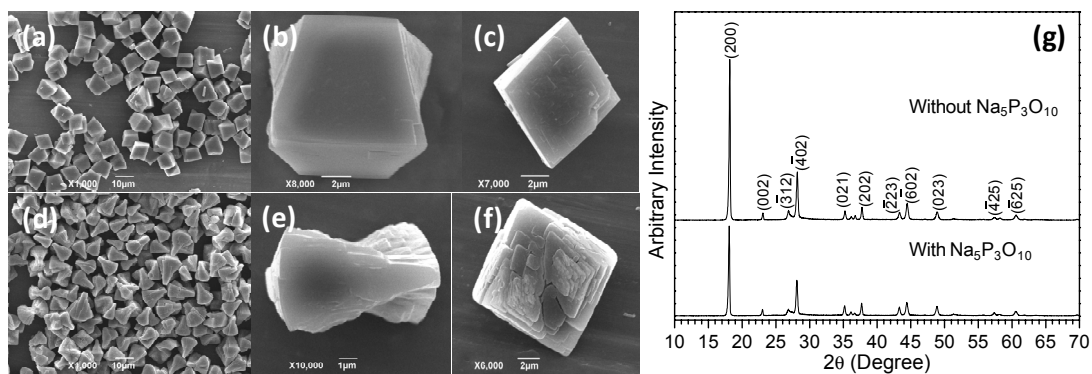

**Figure S-2.** SEM images of the particles obtained from the reaction between  $\text{Na}_2\text{C}_2\text{O}_4$  and  $\text{Mg}(\text{NO}_3)_2$  solutions (a-c) without and (d-f) in the presence of 0.05 g  $\text{Na}_5\text{P}_3\text{O}_{10}$  at 323 K, in which (a) and (d) are the particles at a low magnification, (b) and (e) are the side views, and (c) and (f) are the front views of the representative particles; (g) Typical XRD patterns of the products from the reaction systems without and in the presence of 0.05 g  $\text{Na}_5\text{P}_3\text{O}_{10}$ .

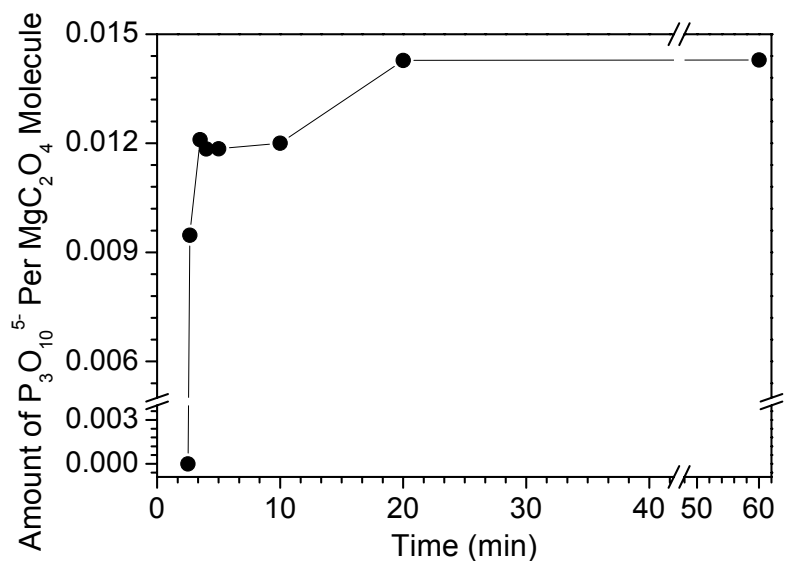

**Figure S-3.** Plot of the amount of  $P_3O_{10}^{5-}$  per  $MgC_2O_4$  molecule from XPS measurements by adding 2 mL aqueous solution containing 0.05 g  $Na_5P_3O_{10}$  into the reaction solution of  $Na_2C_2O_4$  and  $Mg(NO_3)_2$  with a delay time of 2.5 min followed by various total reaction periods. The calculations of the atomic ratios for XPS analyses were same as those in Figure 2.
